# Supplementary material for: Environmentally Induced Transgenerational Epigenetic Reprogramming of Primordial Germ Cells and the Subsequent Germ Line
Source: PubMed Central journal article supplement (PMC3712023; doi:10.1371/journal.pone.0066318), 2013-07-15

### Microarray Hybridization Profiles

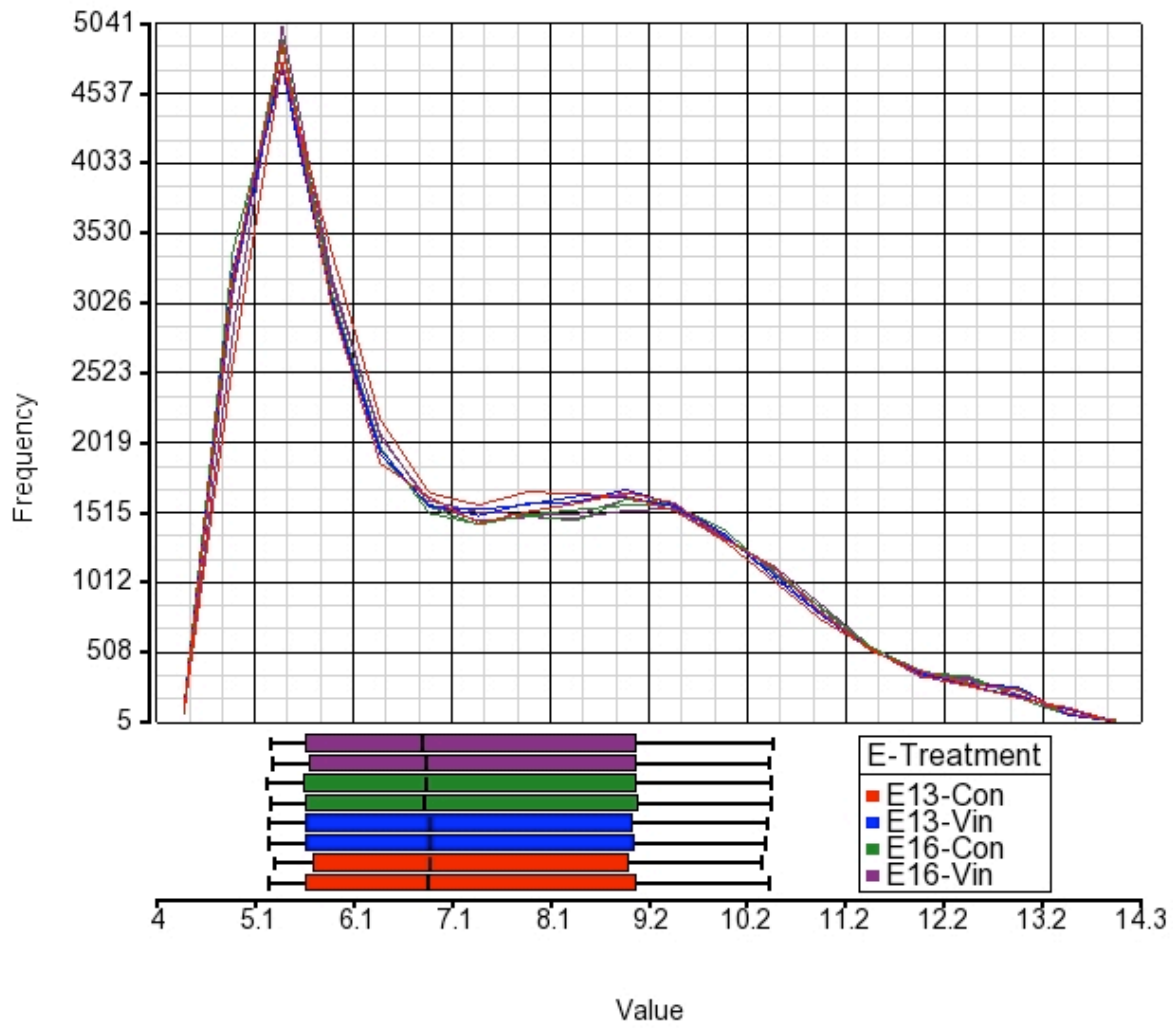

Supplement: pone.0066318.s001.pdf [file pone.0066318.s001.pdf]
