# Supplementary material for: Environmentally Induced Transgenerational Epigenetic Reprogramming of Primordial Germ Cells and the Subsequent Germ Line
Source: PubMed Central journal article supplement (PMC3712023; doi:10.1371/journal.pone.0066318), 2013-07-15
Supplement: pone.0066318.s002.pdf [file pone.0066318.s002.pdf]

Supplemental Table S1

Genes Differentially Expressed in E13 F3 Generation Primordial Germ Cells

| GENE FUNCTIONAL GROUP/ Gene Symbol | RefSeq/GenBank/ Ensemble Number | Affymetrix Probeset ID | Vin/Con     | Mean Diff. | Gene Title                                                |
|------------------------------------|---------------------------------|------------------------|-------------|------------|-----------------------------------------------------------|
| <b>Apoptosis</b>                   |                                 |                        |             |            |                                                           |
| Aven                               | NM_001107757                    | 10838512               | 1.23        | 79         | apoptosis, caspase activation inhibitor                   |
| Moap1                              | NM_001013101                    | 10891861               | 1.28        | 24         | modulator of apoptosis 1                                  |
| RGD1559610                         | BC168964                        | 10879679               | 1.22        | 125        | similar to CGI-94 protein                                 |
| Tnfsf14                            | NM_001191803                    | 10931712               | 0.81        | -10        | tumor necrosis factor (ligand) superfamily, member 14     |
| <b>Cell Cycle</b>                  |                                 |                        |             |            |                                                           |
| Ccne2                              | NM_001108656                    | 10867614               | 1.36        | 327        | cyclin E2                                                 |
| Cdkn2c                             | NM_131902                       | 10878705               | 1.69        | 81         | cyclin-dependent kinase inhibitor 2C (p18, inhibits CDK4) |
| Cinp                               | NM_001106758                    | 10892212               | 1.29        | 63         | cyclin-dependent kinase 2-interacting protein             |
| <b>Cytoskeleton-ECM</b>            |                                 |                        |             |            |                                                           |
| Mxra8                              | NM_001007002                    | 10882224               | 0.83        | -11        | matrix-remodelling associated 8                           |
| Actn2                              | NM_001170325                    | 10795736               | 0.83        | -10        | actinin alpha 2                                           |
| Actr10                             | NM_001009602                    | 10885031               | 1.24        | 331        | actin-related protein 10 homolog (S. cerevisiae)          |
| Bfsp1                              | NM_031555                       | 10850352               | 1.22        | 19         | beaded filament structural protein 1                      |
| Cdh19                              | NM_001009448                    | 10767016               | 2.74        | 54         | cadherin 19, type 2                                       |
| Cno                                | NM_001100766                    | 10773331               | 1.33        | 19         | cappuccino homolog (mouse)                                |
| Cotl1                              | NM_001108452                    | 10811452               | 1.25        | 127        | coactosin-like 1 (Dictyostelium)                          |
| Dnah9                              | D26500                          | 10743677               | 0.78        | -17        | dynein, axonemal, heavy polypeptide 9                     |
| Erc2                               | NM_170787                       | 10786382               | 1.28        | 15         | ELKS/RAB6-interacting/CAST family member 2                |
| Erlec1                             | NM_001106023                    | 10778897               | 1.27        | 277        | endoplasmic reticulum lectin 1                            |
| Gpm6a                              | NM_178105                       | 10791552               | 1.42        | 86         | glycoprotein m6a                                          |
| Krt15                              | NM_001004022                    | 10747252               | 0.79        | -13        | keratin 15                                                |
| Krt40                              | ENSRNOT00000045189              | 10747139               | 0.78        | -67        | keratin 40                                                |
| Krt83                              | NM_001101675                    | 10907357               | 0.80        | -19        | keratin 83                                                |
| Krtap31-1                          | NM_001109409                    | 10738168               | 0.78        | -133       | keratin associated protein 31-1                           |
| Krtap4-5                           | ENSRNOT00000068237              | 10747166               | 0.70        | -28        | keratin associated protein 4-5                            |
| Krtap5-5                           | ENSRNOT00000047885              | 10726935               | 0.71        | -171       | keratin associated protein 5-5                            |
| Lgals2                             | NM_133599                       | 10905356               | 1.45        | 32         | lectin, galactoside-binding, soluble, 2                   |
| Lgals8                             | NM_053862                       | 10795724               | 1.29        | 79         | lectin, galactoside-binding, soluble, 8                   |
| LOC292516                          | NM_001013893                    | 10718462               | 0.75        | -12        | similar to actin-like 7-alpha-like protein                |
| Myo1d                              | NM_012983                       | 10745509               | 1.37        | 85         | myosin ID                                                 |
| <b>Pcdh15</b>                      | <b>ENSRNOT00000066040</b>       | <b>10832646</b>        | <b>0.56</b> | <b>-57</b> | <b>protocadherin 15</b>                                   |
| Pcdh7                              | NM_001004087                    | 10776978               | 0.72        | -117       | protocadherin 7                                           |
| RGD1566146                         | ENSRNOT00000047104              | 10747185               | 0.74        | -103       | similar to keratin associated protein 4-10                |
| Twf1                               | NM_001008521                    | 10906533               | 1.26        | 203        | twinfilin, actin-binding protein, homolog 1 (Drosophila)  |
| <b>Development</b>                 |                                 |                        |             |            |                                                           |
| Brp44l                             | NM_133561                       | 10718102               | 1.33        | 76         | brain protein 44-like                                     |
| Cisd2                              | NM_001191608                    | 10826914               | 1.26        | 73         | CDGSH iron sulfur domain 2                                |
| Cops3                              | NM_001004200                    | 10743186               | 1.21        | 329        | COP9 constitutive photomorphogenic homolog subunit        |

|                           |                     |                 |             |            |                                                                                                                  |
|---------------------------|---------------------|-----------------|-------------|------------|------------------------------------------------------------------------------------------------------------------|
|                           |                     |                 |             |            | 3 (Arabidopsis)                                                                                                  |
| Cyfp2                     | NM_001106996        | 10742254        | 1.39        | 75         | cytoplasmic FMR1 interacting protein 2                                                                           |
| Dynlt3                    | NM_001013228        | 10932366        | 1.24        | 70         | dynein light chain Tctex-type 3                                                                                  |
| Fez2                      | NM_053600           | 10887831        | 1.35        | 46         | fasciculation and elongation protein zeta 2 (zygin II)                                                           |
| Fkrp                      | NM_001025678        | 10719291        | 1.24        | 44         | fukutin related protein                                                                                          |
| Gdap111                   | NM_001107798        | 10842001        | 1.36        | 36         | ganglioside-induced differentiation-associated protein 1-like 1                                                  |
| Htatip2                   | NM_001106263        | 10707230        | 1.47        | 49         | HIV-1 tat interactive protein 2, homolog (human)                                                                 |
| Lce1d                     | ENSRNOT00000012464  | 10817123        | 0.71        | -24        | late cornified envelope 1D                                                                                       |
| Lcn12                     | NM_001128138        | 10843468        | 0.83        | -26        | lipocalin 12                                                                                                     |
| <b>LOC171573</b>          | <b>NM_138537</b>    | <b>10909012</b> | <b>0.75</b> | <b>-22</b> | <b>spleen protein 1 precursor</b>                                                                                |
| LOC685769                 | ENSRNOT00000042069  | 10772840        | 0.79        | -50        | similar to Discs large homolog 5 (Placenta and prostate DLG) (Discs large protein P-dlg)                         |
| Lrrc56                    | NM_001024902        | 10712224        | 0.77        | -35        | leucine rich repeat containing 56                                                                                |
| Lrrc57                    | NM_001012354        | 10839043        | 1.20        | 64         | leucine rich repeat containing 57                                                                                |
| Mlc1                      | NM_001108105        | 10906079        | 0.81        | -11        | megalencephalic leukoencephalopathy with subcortical cysts 1 homolog (human)                                     |
| <b>Mospd1</b>             | <b>NM_001014107</b> | <b>10939816</b> | <b>1.31</b> | <b>149</b> | <b>motile sperm domain containing 1 (chrX)</b>                                                                   |
| Mospd1                    | NM_001014107        | 10778399        | 1.31        | 160        | motile sperm domain containing 1 (chr14)                                                                         |
| Myog                      | NM_017115           | 10764092        | 0.75        | -12        | myogenin                                                                                                         |
| Osr1                      | NM_001106716        | 10883586        | 0.72        | -16        | odd-skipped related 1 (Drosophila)                                                                               |
| Pno1                      | NM_199083           | 10778568        | 1.47        | 379        | partner of NOB1 homolog (S. cerevisiae)                                                                          |
| RGD1560580                | ENSRNOT00000048690  | 10758104        | 0.52        | -77        | similar to spermiogenesis specific transcript on the Y 2 (chr12)                                                 |
| RGD1560580                | ENSRNOT00000048690  | 10791327        | 0.54        | -50        | similar to spermiogenesis specific transcript on the Y 2 (chr14)                                                 |
| Sema4b                    | NM_001170462        | 10708154        | 1.21        | 92         | sema domain, immunoglobulin domain (Ig), transmembrane domain (TM) and short cytoplasmic domain, (semaphorin) 4B |
| Sprr1a1                   | ENSRNOT00000012174  | 10824732        | 0.66        | -25        | small proline-rich protein 1A-like                                                                               |
| Sprr1b                    | ENSRNOT00000040171  | 10824726        | 0.82        | -18        | small proline-rich protein 1B (cornifin)                                                                         |
| Surf1                     | NM_172068           | 10843881        | 1.41        | 81         | surfeit 1                                                                                                        |
| Suv420h2                  | NM_001107475        | 10718873        | 0.80        | -76        | suppressor of variegation 4-20 homolog 2 (Drosophila)                                                            |
| Tex101                    | NM_139037           | 10719674        | 1.63        | 439        | testis expressed 101                                                                                             |
| Trpc6                     | NM_053559           | 10907962        | 1.63        | 55         | transient receptor potential cation channel, subfamily C, member 6                                               |
| Vcsa2                     | NM_198729           | 10776116        | 0.77        | -12        | variable coding sequence A2                                                                                      |
| Wrb                       | NM_199373           | 10750473        | 1.20        | 150        | tryptophan rich basic protein                                                                                    |
| <b>DNA Repair</b>         |                     |                 |             |            |                                                                                                                  |
| Rad52                     | NM_001106617        | 10858260        | 0.83        | -63        | RAD52 homolog (S. cerevisiae)                                                                                    |
| <b>Electron Transport</b> |                     |                 |             |            |                                                                                                                  |
| Cyp2c22                   | NM_138512           | 10730046        | 0.74        | -10        | cytochrome P450, family 2, subfamily c, polypeptide 22                                                           |
| LOC679879                 | ENSRNOT00000061522  | 10786123        | 0.59        | -65        | similar to Spetex-2F protein                                                                                     |
| Tmem126a                  | NM_001011557        | 10723639        | 1.27        | 74         | transmembrane protein 126A                                                                                       |
| Txndc16                   | ENSRNOT00000008372  | 10782804        | 1.53        | 100        | thioredoxin domain containing 16                                                                                 |
| Txnl1                     | NM_080887           | 10804856        | 1.20        | 494        | thioredoxin-like 1                                                                                               |
| <b>Epigenetics</b>        |                     |                 |             |            |                                                                                                                  |
| Coq3                      | NM_019187           | 10875756        | 1.27        | 207        | coenzyme Q3 homolog, methyltransferase (S. cerevisiae)                                                           |
| <b>Golgi Apparatus</b>    |                     |                 |             |            |                                                                                                                  |
| Gal3st2                   | ENSRNOT00000038687  | 10925678        | 0.77        | -17        | galactose-3-O-sulfotransferase 2                                                                                 |

| <b>Growth Factors, Cytokines, Hormones</b> |                    |                 |             |           |                                                                                                 |
|--------------------------------------------|--------------------|-----------------|-------------|-----------|-------------------------------------------------------------------------------------------------|
| Cmklr1                                     | NM_022218          | 10759198        | 1.48        | 50        | chemokine-like receptor 1                                                                       |
| Hdgfl1                                     | NM_133549          | 10795072        | 0.77        | -43       | hepatoma derived growth factor-like 1                                                           |
| Pyy                                        | NM_001034080       | 10747735        | 0.77        | -13       | peptide YY (mapped)                                                                             |
| Retn                                       | NM_144741          | 10759611        | 0.78        | -14       | resistin                                                                                        |
| Sept7                                      | NM_022616          | 10908674        | 1.23        | 295       | septin 7                                                                                        |
| Pthlh                                      | NM_012636          | 10866970        | 0.83        | -44       | parathyroid hormone-like hormone                                                                |
| Gcg                                        | NM_012707          | 10845676        | 0.20        | -80       | glucagon                                                                                        |
| <b>Immune Response</b>                     |                    |                 |             |           |                                                                                                 |
| Ahsg                                       | NM_012898          | 10755157        | 2.13        | 78        | alpha-2-HS-glycoprotein                                                                         |
| Ambp                                       | NM_012901          | 10877448        | 1.51        | 21        | alpha-1-microglobulin/bikunin precursor                                                         |
| Cd80                                       | NM_012926          | 10754176        | 1.36        | 25        | Cd80 molecule                                                                                   |
| Cfd                                        | NM_001077642       | 10900735        | 1.28        | 12        | complement factor D (adipsin)                                                                   |
| Ifna4                                      | NM_001106667       | 10877954        | 0.78        | -15       | interferon, alpha 4                                                                             |
| IgG-2a                                     | BC088240           | 10892506        | 0.70        | -114      | gamma-2a immunoglobulin heavy chain                                                             |
| Igh-6                                      | BC092586           | 10892653        | 0.57        | -35       | immunoglobulin heavy chain 6                                                                    |
| LOC682821                                  | ENSRNOT00000031103 | 10862947        | 0.47        | -23       | pre-B lymphocyte 3-like                                                                         |
| Ly6g6c                                     | NM_001001969       | 10831236        | 0.72        | -41       | lymphocyte antigen 6 complex, locus G6C                                                         |
| Ly75                                       | ENSRNOT00000010683 | 10845517        | 1.20        | 16        | lymphocyte antigen 75                                                                           |
| Magea10                                    | ENSRNOT00000052261 | 10935804        | 0.79        | -11       | melanoma antigen family A, 10                                                                   |
| RGD1564284                                 | ENSRNOT00000044584 | 10892509        | 0.64        | -36       | similar to immunoglobulin 4G6 heavy chain variable region                                       |
| RGD1564392                                 | ENSRNOT00000067463 | 10887662        | 0.73        | -107      | similar to immunoglobulin heavy chain variable region                                           |
| Vpreb2                                     | NM_001134788       | 10755629        | 0.80        | -54       | pre-B lymphocyte gene 2                                                                         |
| Xlr3a                                      | ENSRNOT00000040782 | 10940120        | 1.39        | 56        | X-linked lymphocyte-regulated 3A                                                                |
| <b>Metabolism &amp; Transport</b>          |                    |                 |             |           |                                                                                                 |
| Abhd10                                     | NM_001123352       | 10751018        | 0.82        | -151      | abhydrolase domain containing 10                                                                |
| Agpat5                                     | NM_001134744       | 10792592        | 1.30        | 706       | 1-acylglycerol-3-phosphate O-acyltransferase 5 (lysophosphatidic acid acyltransferase, epsilon) |
| Aldh9a1                                    | NM_022273          | 10765399        | 1.21        | 232       | aldehyde dehydrogenase 9 family, member A1                                                      |
| Aldob                                      | NM_012496          | 10876719        | 1.61        | 63        | aldolase B, fructose-bisphosphate                                                               |
| Aqp2                                       | NM_012909          | 10899145        | 0.69        | -21       | aquaporin 2 (collecting duct)                                                                   |
| Aqp6                                       | NM_022181          | 10899139        | 0.81        | -10       | aquaporin 6, kidney specific                                                                    |
| Atp1b3                                     | NM_012913          | 10910191        | 1.27        | 533       | ATPase, Na <sup>+</sup> /K <sup>+</sup> transporting, beta 3 polypeptide                        |
| B3galt6                                    | NM_001106699       | 10882246        | 1.21        | 19        | UDP-Gal:betaGal beta 1,3-galactosyltransferase, polypeptide 6                                   |
| Catsperg1                                  | NM_001170340       | 10720437        | 0.65        | -84       | cation channel, sperm-associated, gamma 1                                                       |
| Clcn1                                      | NM_013147          | 10855035        | 0.83        | -10       | chloride channel 1                                                                              |
| Cmc1                                       | NM_001135259       | 10920797        | 1.70        | 89        | COX assembly mitochondrial protein homolog (S. cerevisiae)                                      |
| Echdc1                                     | NM_001007734       | 10717413        | 1.22        | 55        | enoyl Coenzyme A hydratase domain containing 1                                                  |
| Eno3                                       | NM_012949          | 10735331        | 0.76        | -41       | enolase 3, beta, muscle                                                                         |
| Hdc                                        | NM_017016          | 10849522        | 1.76        | 34        | histidine decarboxylase                                                                         |
| <b>Hmox1</b>                               | <b>NM_012580</b>   | <b>10806122</b> | <b>1.21</b> | <b>34</b> | <b>heme oxygenase (decycling) 1</b>                                                             |
| Kcnj10                                     | NM_031602          | 10765740        | 0.83        | -14       | potassium inwardly-rectifying channel, subfamily J, member 10                                   |
| Kcnk18                                     | NM_001003820       | 10716430        | 0.71        | -27       | potassium channel, subfamily K, member 18                                                       |
| Klk1l                                      | NM_012593          | 10706488        | 0.63        | -33       | kallikrein 1-like peptidase                                                                     |
| Klk5l                                      | ENSRNOT00000056456 | 10706474        | 0.80        | -10       | kallikrein 5-like                                                                               |
| Lactb2                                     | NM_001024247       | 10867165        | 1.40        | 153       | lactamase, beta 2                                                                               |
| Lpcat1                                     | NM_001100735       | 10717571        | 1.22        | 170       | lysophosphatidylcholine acyltransferase 1                                                       |

|                                         |                    |                 |             |           |                                                                                        |
|-----------------------------------------|--------------------|-----------------|-------------|-----------|----------------------------------------------------------------------------------------|
| Lpl                                     | NM_012598          | 10791250        | 1.41        | 44        | lipoprotein lipase                                                                     |
| Lrp1b                                   | NM_001107843       | 10845057        | 0.79        | -13       | low density lipoprotein-related protein 1B (deleted in tumors)                         |
| Moxd1                                   | ENSRNOT00000061234 | 10717240        | 1.77        | 246       | monooxygenase, DBH-like 1                                                              |
| Mthfd1l                                 | BC166462           | 10702626        | 1.25        | 59        | methylenetetrahydrofolate dehydrogenase (NADP+ dependent) 1-like                       |
| Mthfd2l                                 | NM_001107211       | 10775885        | 1.20        | 13        | methylenetetrahydrofolate dehydrogenase (NADP+ dependent) 2-like                       |
| Nt5dc3                                  | NM_001134887       | 10894660        | 1.33        | 37        | 5'-nucleotidase domain containing 3                                                    |
| RGD1560203                              | ENSRNOT00000041781 | 10937824        | 0.64        | -63       | similar to ferritin heavy polypeptide-like 17                                          |
| Slc25a10                                | NM_133418          | 10740159        | 1.23        | 113       | solute carrier family 25 (mitochondrial carrier; dicarboxylate transporter), member 10 |
| <b>Slc25a25</b>                         | <b>NM_145677</b>   | <b>10844339</b> | <b>1.25</b> | <b>21</b> | <b>solute carrier family 25 (mitochondrial carrier, phosphate carrier), member 25</b>  |
| Slc25a26                                | NM_001108638       | 10857412        | 0.79        | -56       | solute carrier family 25, member 26                                                    |
| Slc25a32                                | NM_001173334       | 10903482        | 1.20        | 88        | solute carrier family 25, member 32                                                    |
| Slc35a2                                 | NM_001127642       | 10936987        | 0.82        | -33       | solute carrier family 35, member A2                                                    |
| Slc6a2                                  | NM_031343          | 10809507        | 0.72        | -20       | solute carrier family 6 (neurotransmitter transporter, noradrenalin), member 2         |
| St3gal5                                 | NM_031337          | 10856357        | 1.38        | 212       | ST3 beta-galactoside alpha-2,3-sialyltransferase 5                                     |
| Tmem161a                                | NM_001108874       | 10791058        | 0.82        | -60       | transmembrane protein 161A                                                             |
| Trappc2                                 | NM_001024965       | 10937660        | 1.25        | 205       | trafficking protein particle complex 2                                                 |
| Ugp2                                    | NM_001024743       | 10778647        | 1.27        | 370       | UDP-glucose pyrophosphorylase 2                                                        |
| Uxs1                                    | NM_139336          | 10931543        | 1.25        | 316       | UDP-glucuronate decarboxylase 1                                                        |
| <b>Proteolysis</b>                      |                    |                 |             |           |                                                                                        |
| Dcun1d2                                 | ENSRNOT00000026370 | 10789470        | 1.27        | 26        | DCN1, defective in cullin neddylation 1, domain containing 2 ( <i>S. cerevisiae</i> )  |
| LOC498793                               | BC100087           | 10796173        | 1.91        | 39        | similar to inter-alpha-inhibitor H2 chain                                              |
| LOC686393                               | ENSRNOT00000057510 | 10863662        | 0.81        | -168      | similar to Protease-associated domain-containing protein of 21 kDa precursor           |
| Mcpt1l2                                 | ENSRNOT00000038253 | 10780574        | 0.75        | -17       | mast cell protease 1-like 2                                                            |
| Mcpt1l3                                 | ENSRNOT00000045948 | 10780588        | 0.74        | -19       | mast cell protease 1-like 3                                                            |
| Prss2                                   | ENSRNOT00000029319 | 10854953        | 0.78        | -15       | protease, serine, 2                                                                    |
| RGD1565317                              | ENSRNOT00000017230 | 10736332        | 1.32        | 123       | similar to ubiquitin-like/S30 ribosomal fusion protein                                 |
| Rlim                                    | NM_001024892       | 10938841        | 1.27        | 319       | ring finger protein, LIM domain interacting                                            |
| Rnf103                                  | NM_053438          | 10856282        | 1.29        | 173       | ring finger protein 103                                                                |
| Slpil3                                  | NM_001008873       | 10851577        | 0.78        | -27       | antileukoproteinase-like 3                                                             |
| Tmprss4                                 | NM_001108998       | 10916963        | 0.83        | -10       | transmembrane protease, serine 4                                                       |
| Ube2v2                                  | NM_183052          | 10752621        | 1.35        | 168       | ubiquitin-conjugating enzyme E2 variant 2                                              |
| Vps33b                                  | NM_022286          | 10708188        | 1.27        | 102       | vacuolar protein sorting 33 homolog B (yeast)                                          |
| Vps53                                   | NM_001105813       | 10744999        | 1.27        | 179       | vacuolar protein sorting 53 homolog ( <i>S. cerevisiae</i> )                           |
| <b>Receptors &amp; Binding Proteins</b> |                    |                 |             |           |                                                                                        |
| Adipor2                                 | NM_001037979       | 10865081        | 1.31        | 390       | adiponectin receptor 2                                                                 |
| Fgfbp1                                  | NM_022603          | 10773146        | 0.76        | -16       | fibroblast growth factor binding protein 1                                             |
| Hbxip                                   | NM_001106462       | 10818257        | 1.28        | 123       | hepatitis B virus x interacting protein                                                |
| Itgb1bp2                                | NM_001108245       | 10934394        | 0.80        | -17       | integrin beta 1 binding protein 2                                                      |
| LOC100364003                            | ENSRNOT00000048946 | 10718391        | 0.66        | -41       | vomer nasal 2, receptor 42-like                                                        |
| Ltb4r                                   | NM_021656          | 10780505        | 0.83        | -12       | leukotriene B4 receptor                                                                |

|         |                    |          |      |       |                                 |
|---------|--------------------|----------|------|-------|---------------------------------|
| Ly49s4  | AY649838           | 10866180 | 0.66 | -27   | Ly49 stimulatory receptor 4     |
| Olr1014 | NM_001000699       | 10893397 | 0.64 | -19   | olfactory receptor 1014         |
| Olr105  | NM_001000146       | 10724274 | 0.73 | -17   | olfactory receptor 105          |
| Olr1051 | NM_001001364       | 10900077 | 0.57 | -23   | olfactory receptor 1051         |
| Olr1059 | NM_001001362       | 10900085 | 0.75 | -15   | olfactory receptor 1059         |
| Olr1071 | NM_001000063       | 10900099 | 0.66 | -17   | olfactory receptor 1071         |
| Olr1093 | NM_001001388       | 10901100 | 0.59 | -27   | olfactory receptor 1093         |
| Olr1104 | NM_001000906       | 10906846 | 0.80 | -10   | olfactory receptor 1104         |
| Olr113  | NM_001000151       | 10724282 | 0.73 | -11   | olfactory receptor 113          |
| Olr1135 | NM_001000878       | 10915265 | 0.67 | -12   | olfactory receptor 1135         |
| Olr1137 | NM_001001079       | 10915267 | 0.83 | -11   | olfactory receptor 1137         |
| Olr114  | NM_001000951       | 10724284 | 0.64 | -17   | olfactory receptor 114          |
| Olr1143 | NM_001001017       | 10908171 | 0.68 | -15   | olfactory receptor 1143         |
| Olr1159 | NM_001000871       | 10908191 | 0.70 | -13   | olfactory receptor 1159         |
| Olr1186 | NM_001000862       | 10908237 | 0.63 | -22   | olfactory receptor 1186         |
| Olr1203 | NM_001001082       | 10909117 | 0.72 | -11   | olfactory receptor 1203         |
| Olr1234 | NM_001000446       | 10909170 | 0.63 | -18   | olfactory receptor 1234         |
| Olr1280 | NM_001000517       | 10916319 | 0.77 | -14   | olfactory receptor 1280         |
| Olr1329 | NM_001000791       | 10909305 | 0.74 | -9.97 | olfactory receptor 1329         |
| Olr1330 | NM_001000476       | 10916410 | 0.74 | -23   | olfactory receptor 1330         |
| Olr1355 | NM_214823          | 10749816 | 0.82 | -10   | olfactory receptor 1355         |
| Olr1364 | NM_001000858       | 10740780 | 0.71 | -41   | olfactory receptor 1364         |
| Olr1384 | NM_001002291       | 10742363 | 0.74 | -13   | olfactory receptor gene Olr1384 |
| Olr1385 | NM_214833          | 10742365 | 0.68 | -26   | olfactory receptor 1385         |
| Olr1387 | NM_001000001       | 10733072 | 0.69 | -31   | olfactory receptor 1387         |
| Olr139  | NM_001000161       | 10709469 | 0.81 | -22   | olfactory receptor 139          |
| Olr1392 | NM_001001090       | 10733082 | 0.76 | -12   | olfactory receptor 1392         |
| Olr14   | NM_001000695       | 10723503 | 0.75 | -10   | olfactory receptor 14           |
| Olr1425 | NM_001000010       | 10742940 | 0.75 | -14   | olfactory receptor 1425         |
| Olr1440 | NM_001000017       | 10742958 | 0.78 | -22   | olfactory receptor 1440         |
| Olr1450 | NM_001000774       | 10733892 | 0.78 | -14   | olfactory receptor 1450         |
| Olr1455 | NM_001000771       | 10733902 | 0.71 | -35   | olfactory receptor 1455         |
| Olr1471 | NM_001000722       | 10735733 | 0.58 | -73   | olfactory receptor 1471         |
| Olr1481 | NM_001000527       | 10735735 | 0.73 | -23   | olfactory receptor 1481         |
| Olr1509 | NM_001000528       | 10744819 | 0.79 | -12   | olfactory receptor 1509         |
| Olr1515 | NM_001001098       | 10735765 | 0.67 | -22   | olfactory receptor 1515         |
| Olr1531 | NM_001001102       | 10750612 | 0.75 | -14   | olfactory receptor 1531         |
| Olr1576 | NM_001000499       | 10765813 | 0.76 | -13   | olfactory receptor 1576         |
| Olr1585 | NM_001001109       | 10765829 | 0.75 | -14   | olfactory receptor 1585         |
| Olr1602 | NM_001000909       | 10765910 | 0.73 | -10   | olfactory receptor 1602         |
| Olr1611 | ENSRNOT00000016721 | 10779768 | 0.64 | -12   | olfactory receptor 1611         |
| Olr1612 | NM_001000096       | 10783036 | 0.72 | -15   | olfactory receptor 1612         |
| Olr1625 | NM_001000971       | 10783044 | 0.67 | -16   | olfactory receptor 1625         |
| Olr1697 | NM_001001111       | 10830800 | 0.69 | -18   | olfactory receptor 1697         |
| Olr1701 | NM_001001114       | 10830808 | 0.75 | -11   | olfactory receptor 1701         |
| Olr174  | NM_001001028       | 10724415 | 0.62 | -22   | olfactory receptor 174          |
| Olr176  | NM_001000178       | 10724420 | 0.78 | -16   | olfactory receptor 176          |
| Olr181  | NM_001001030       | 10724426 | 0.71 | -12   | olfactory receptor 181          |
| Olr190  | NM_001000185       | 10709544 | 0.72 | -15   | olfactory receptor 190          |
| Olr255  | NM_001000947       | 10724672 | 0.70 | -23   | olfactory receptor 255          |
| Olr323  | NM_001000245       | 10728988 | 0.70 | -12   | olfactory receptor 323          |
| Olr397  | NM_001000380       | 10835839 | 0.77 | -14   | olfactory receptor 397          |
| Olr408  | NM_001000384       | 10835861 | 0.73 | -10   | olfactory receptor 408          |
| Olr424  | NM_001000392       | 10844768 | 0.73 | -14   | olfactory receptor 424          |
| Olr425  | NM_001000393       | 10844770 | 0.82 | -16   | olfactory receptor 425          |
| Olr43   | NM_001000541       | 10709366 | 0.70 | -24   | olfactory receptor 43           |
| Olr434  | NM_001000397       | 10835890 | 0.83 | -13   | olfactory receptor 434          |
| Olr479  | NM_001000305       | 10846946 | 0.79 | -13   | olfactory receptor 479          |
| Olr556  | NM_001000929       | 10837508 | 0.72 | -19   | olfactory receptor 556          |
| Olr567  | NM_001000326       | 10847060 | 0.74 | -11   | olfactory receptor 567          |
| Olr57   | NM_001000749       | 10724236 | 0.75 | -15   | olfactory receptor 57           |
| Olr578  | NM_001000568       | 10847072 | 0.73 | -14   | olfactory receptor 578          |
| Olr60   | NM_001000748       | 10709388 | 0.67 | -19   | olfactory receptor 60           |

|                  |                     |                 |             |            |                                                                       |
|------------------|---------------------|-----------------|-------------|------------|-----------------------------------------------------------------------|
| Olr602           | NM_001000333        | 10847082        | 0.76        | -13        | olfactory receptor 602                                                |
| Olr637           | NM_001001126        | 10837590        | 0.69        | -14        | olfactory receptor 637                                                |
| Olr640           | NM_001000644        | 10837594        | 0.74        | -12        | olfactory receptor 640                                                |
| Olr652           | NM_001000638        | 10847122        | 0.76        | -11        | olfactory receptor 652                                                |
| Olr684           | NM_001001378        | 10837624        | 0.76        | -11        | olfactory receptor 684                                                |
| Olr728           | NM_001000363        | 10837640        | 0.57        | -23        | olfactory receptor 728                                                |
| Olr733           | NM_001000618        | 10847240        | 0.59        | -21        | olfactory receptor 733                                                |
| Olr734           | NM_001000617        | 10847242        | 0.72        | -14        | olfactory receptor 734                                                |
| Olr756           | NM_001000614        | 10838414        | 0.61        | -18        | olfactory receptor 756                                                |
| Olr767           | NM_001000611        | 10848109        | 0.69        | -13        | olfactory receptor 767                                                |
| Olr789           | NM_001000377        | 10848144        | 0.72        | -13        | olfactory receptor 789                                                |
| Olr803           | NM_001000853        | 10862285        | 0.77        | -12        | olfactory receptor 803                                                |
| Olr828           | NM_001000991        | 10858150        | 0.69        | -14        | olfactory receptor 828                                                |
| Olr839           | NM_001000415        | 10876461        | 0.67        | -23        | olfactory receptor 839                                                |
| Olr856           | NM_001000515        | 10879321        | 0.74        | -17        | olfactory receptor 856                                                |
| Olr86            | NM_001000747        | 10709417        | 0.66        | -20        | olfactory receptor 86                                                 |
| <b>Olr862</b>    | <b>NM_001001071</b> | <b>10879329</b> | <b>0.70</b> | <b>-16</b> | <b>olfactory receptor 862</b>                                         |
| Olr865           | NM_001000410        | 10879335        | 0.71        | -16        | olfactory receptor 865                                                |
| Olr866           | NM_001000411        | 10879337        | 0.44        | -54        | olfactory receptor 866                                                |
| Olr868           | NM_001000821        | 10879341        | 0.71        | -22        | olfactory receptor 868                                                |
| Olr869           | NM_001000413        | 10879332        | 0.53        | -98        | olfactory receptor 869                                                |
| Olr881           | NM_001000056        | 10899975        | 0.70        | -10        | olfactory receptor 881                                                |
| Olr89            | NM_001000745        | 10709424        | 0.74        | -11        | olfactory receptor 89                                                 |
| Olr907           | NM_001001357        | 10893313        | 0.74        | -13        | olfactory receptor 907                                                |
| Olr917           | NM_001001354        | 10900006        | 0.75        | -11        | olfactory receptor 917                                                |
| P2ry12           | NM_022800           | 10823365        | 1.50        | 91         | purinergic receptor P2Y, G-protein coupled, 12                        |
| Pgrmc2           | NM_001008374        | 10822983        | 1.29        | 279        | progesterone receptor membrane component 2                            |
| Pric285          | ENSRNOT00000017787  | 10852492        | 0.81        | -12        | peroxisomal proliferator-activated receptor A interacting complex 285 |
| Ptbp2            | NM_001005555        | 10826418        | 0.81        | -322       | polypyrimidine tract binding protein 2                                |
| Rbp4             | NM_013162           | 10729970        | 1.64        | 46         | retinol binding protein 4, plasma                                     |
| Ryr3             | ENSRNOT00000049582  | 10848275        | 0.73        | -12        | ryanodine receptor 3                                                  |
| Sstr5            | NM_012882           | 10741456        | 0.81        | -11        | somatostatin receptor 5                                               |
| Taar7e           | NM_175590           | 10717276        | 0.79        | -15        | trace-amine-associated receptor 7e                                    |
| Tas2r114         | NM_023996           | 10866312        | 0.70        | -11        | taste receptor, type 2, member 114                                    |
| Tas2r126         | NM_139335           | 10855079        | 0.77        | -11        | taste receptor, type 2, member 126                                    |
| Tmem67           | NM_001107916        | 10875537        | 0.79        | -139       | transmembrane protein 67                                              |
| Topors           | NM_001108658        | 10876007        | 1.31        | 273        | topoisomerase I binding, arginine/serine-rich                         |
| Vom1r106         | NM_001008965        | 10894293        | 0.69        | -18        | vomer nasal 1 receptor, 106                                           |
| Vom1r29          | NM_001008946        | 10703656        | 0.72        | -10        | vomer nasal 1 receptor, 29                                            |
| Vom1r59          | NM_001008944        | 10704301        | 0.76        | -10        | vomer nasal 1 receptor, 59                                            |
| Vom1r63          | NM_001008967        | 10812084        | 0.69        | -21        | vomer nasal 1 receptor, 63                                            |
| Vom1r86          | NM_001009527        | 10855840        | 0.67        | -17        | vomer nasal 1 receptor, 86                                            |
| Vom1r87          | NM_001009529        | 10855842        | 0.74        | -13        | vomer nasal 1 receptor, 87                                            |
| <b>Vom2r3</b>    | <b>NM_001099460</b> | <b>10701668</b> | <b>0.74</b> | <b>-41</b> | <b>vomer nasal 2 receptor, 3</b>                                      |
| Vom2r59          | NM_001099466        | 10756059        | 0.73        | -12        | vomer nasal 2 receptor, 59                                            |
| <b>Signaling</b> |                     |                 |             |            |                                                                       |
| Arhgap23         | ENSRNOT000000055414 | 10737838        | 1.23        | 46         | Rho GTPase activating protein 23                                      |
| Defb33           | NM_001037523        | 10792563        | 0.72        | -12        | defensin beta 33                                                      |
| Dusp6            | NM_053883           | 10895144        | 1.41        | 567        | dual specificity phosphatase 6                                        |
| Gna13            | NM_001013119        | 10748537        | 1.21        | 214        | guanine nucleotide binding protein, alpha 13                          |
| Gper             | NM_133573           | 10760655        | 1.26        | 11         | G protein-coupled estrogen receptor 1                                 |
| Mapkap1          | NM_001011964        | 10835666        | 1.23        | 103        | mitogen-activated protein kinase associated protein 1                 |
| Mobkl2a          | NM_001108734        | 10893739        | 1.24        | 71         | MOB1, Mps One Binder kinase activator-like 2A (yeast)                 |
| Mobkl2b          | NM_001108970        | 10875954        | 0.83        | -77        | MOB1, Mps One Binder kinase                                           |

|                                               |                     |                 |             |            |                                                                |
|-----------------------------------------------|---------------------|-----------------|-------------|------------|----------------------------------------------------------------|
|                                               |                     |                 |             |            | activator-like 2B (yeast)                                      |
| <b>Phospho2</b>                               | <b>NM_001007642</b> | <b>10836633</b> | <b>1.23</b> | <b>43</b>  | <b>phosphatase, orphan 2</b>                                   |
| Ppp1r14d                                      | NM_172011           | 10848527        | 0.80        | -16        | protein phosphatase 1, regulatory (inhibitor) subunit 14D      |
| Ppp1r1c                                       | NM_001109200        | 10837195        | 1.59        | 35         | protein phosphatase 1, regulatory (inhibitor) subunit 1C       |
| Prkab1                                        | NM_031976           | 10758940        | 1.28        | 153        | protein kinase, AMP-activated, beta 1 non-catalytic subunit    |
| Ptpdc1                                        | NM_001106104        | 10794430        | 1.22        | 31         | protein tyrosine phosphatase domain containing 1               |
| Rab8b                                         | NM_153317           | 10918374        | 1.26        | 489        | RAB8B, member RAS oncogene family                              |
| Rasa3                                         | NM_031574           | 10789401        | 1.30        | 57         | RAS p21 protein activator 3                                    |
| RGD1559699                                    | ENSRNOT00000047604  | 10718167        | 0.44        | -146       | similar to putative protein kinase                             |
| <b>RGD1562638</b>                             | <b>NM_001100944</b> | <b>10788692</b> | <b>0.61</b> | <b>-20</b> | <b>similar to MAP/microtubule affinity-regulating kinase 3</b> |
| Rnd2                                          | NM_001010953        | 10738423        | 1.28        | 125        | Rho family GTPase 2                                            |
| Sike                                          | NM_001012182        | 10817910        | 1.33        | 145        | suppressor of IKK epsilon                                      |
| Smpdl3b                                       | NM_001025737        | 10880339        | 0.79        | -55        | sphingomyelin phosphodiesterase, acid-like 3B                  |
| Sparcl1                                       | NM_012946           | 10771210        | 1.59        | 122        | SPARC-like 1 (hevin)                                           |
| Strap                                         | NM_001011969        | 10859371        | 1.23        | 300        | serine/threonine kinase receptor associated protein            |
| Wisp2                                         | NM_031590           | 10842043        | 0.83        | -13        | WNT1 inducible signaling pathway protein 2                     |
| <b>Transcription</b>                          |                     |                 |             |            |                                                                |
| Ankrd10                                       | ENSRNOT00000018870  | 10789560        | 0.83        | -19        | ankyrin repeat domain 10                                       |
| Ascl1                                         | NM_022384           | 10901531        | 2.50        | 161        | achaete-scute complex homolog 1 (Drosophila)                   |
| Banp                                          | NM_001106191        | 10808461        | 0.80        | -121       | Btg3 associated nuclear protein                                |
| Batf2                                         | ENSRNOT00000028527  | 10713201        | 0.80        | -10        | basic leucine zipper transcription factor, ATF-like 2          |
| Ccdc162                                       | ENSRNOT00000000340  | 10833725        | 0.72        | -16        | coiled-coil domain containing 162                              |
| Ccdc32                                        | NM_001024245        | 10848499        | 1.22        | 46         | coiled-coil domain containing 32                               |
| Ccdc86                                        | NM_001006974        | 10728830        | 1.22        | 113        | coiled-coil domain containing 86                               |
| Dlx1                                          | NM_001100531        | 10836841        | 1.25        | 22         | distal-less homeobox 1                                         |
| <b>Eid3</b>                                   | <b>NM_001044304</b> | <b>10901436</b> | <b>1.29</b> | <b>55</b>  | <b>EP300 interacting inhibitor of differentiation 3</b>        |
| Etv3l                                         | NM_001100992        | 10816303        | 0.71        | -24        | ets variant 3-like                                             |
| Hand2                                         | NM_022696           | 10791504        | 1.29        | 38         | heart and neural crest derivatives expressed 2                 |
| Hivep2                                        | NM_024137           | 10701830        | 1.27        | 70         | human immunodeficiency virus type 1 enhancer binding protein 2 |
| Jund                                          | NM_138875           | 10787505        | 1.23        | 31         | jun D proto-oncogene                                           |
| <b>Klhl36</b>                                 | <b>NM_001017511</b> | <b>10808356</b> | <b>1.36</b> | <b>52</b>  | <b>kelch-like 36 (Drosophila)</b>                              |
| Med4                                          | NM_001024256        | 10781443        | 1.50        | 185        | mediator complex subunit 4                                     |
| Narf                                          | NM_001039207        | 10740240        | 1.22        | 84         | nuclear prelamin A recognition factor                          |
| Obox2                                         | ENSRNOT00000050817  | 10939183        | 0.77        | -13        | oocyte specific homeobox 2                                     |
| Polq                                          | NM_001105878        | 10754260        | 0.82        | -38        | polymerase (DNA directed), theta                               |
| RGD1564651                                    | ENSRNOT00000059037  | 10703873        | 0.75        | -13        | similar to oocyte specific homeobox 3                          |
| Snai3                                         | NM_001107439        | 10811581        | 0.82        | -10        | snail homolog 3 (Drosophila)                                   |
| Trim24                                        | NM_001044266        | 10861908        | 0.67        | -38        | tripartite motif-containing 24                                 |
| Zfp9                                          | NM_001127635        | 10864972        | 0.79        | -20        | zinc finger protein 9                                          |
| Znrd1                                         | NM_001166300        | 10827696        | 0.80        | -195       | zinc ribbon domain containing, 1                               |
| Hoxd12                                        | NM_001191903        | 10836999        | 0.80        | -11        | homeo box D12                                                  |
| <b>Ddx25</b>                                  | <b>NM_031630</b>    | <b>10916060</b> | <b>1.23</b> | <b>36</b>  | <b>DEAD (Asp-Glu-Ala-Asp) box polypeptide 25</b>               |
| <b>Translation &amp; Protein Modification</b> |                     |                 |             |            |                                                                |
| Tarsl2                                        | NM_001014020        | 10707756        | 1.37        | 19         | threonyl-tRNA synthetase-like 2                                |
| Rp9                                           | NM_001108756        | 10915773        | 1.29        | 169        | retinitis pigmentosa 9 (human)                                 |
| Rsl24d1                                       | NM_001014212        | 10911538        | 1.33        | 184        | ribosomal L24 domain containing 1                              |

|                                    |                           |                 |             |            |                                                                                                                                   |
|------------------------------------|---------------------------|-----------------|-------------|------------|-----------------------------------------------------------------------------------------------------------------------------------|
| Arl3                               | NM_022700                 | 10730591        | 0.82        | -102       | ADP-ribosylation factor-like 3                                                                                                    |
| Arl5a                              | NM_053979                 | 10845298        | 1.26        | 209        | ADP-ribosylation factor-like 5A                                                                                                   |
| LOC683469                          | BC158599                  | 10790603        | 0.71        | -21        | similar to RNA polymerase II transcription factor SIII subunit A2 (Elongin A2) (Transcription elongation factor B polypeptide 3B) |
| Mrps14                             | NM_001105963              | 10764983        | 1.23        | 130        | mitochondrial ribosomal protein S14                                                                                               |
| RGD1561453                         | ENSRNOT00000049732        | 10714411        | 1.39        | 105        | similar to ribosomal protein S12                                                                                                  |
| RGD1564325                         | ENSRNOT00000047252        | 10790214        | 1.29        | 22         | similar to ribosomal protein S24                                                                                                  |
| Rnase4                             | NM_020082                 | 10779832        | 1.51        | 46         | ribonuclease, RNase A family 4                                                                                                    |
| Arf6                               | NM_024152                 | 10884961        | 1.25        | 617        | ADP-ribosylation factor 6                                                                                                         |
| Lsm5                               | NM_001107289              | 10862728        | 1.28        | 111        | LSM5 homolog, U6 small nuclear RNA associated (S. cerevisiae)                                                                     |
| Mrpl40                             | NM_001024865              | 10755987        | 1.22        | 105        | mitochondrial ribosomal protein L40 (chr11_random)                                                                                |
| Mrpl40                             | NM_001024865              | 10781424        | 1.23        | 109        | mitochondrial ribosomal protein L40 (chr15)                                                                                       |
| Mrpl48                             | NM_001106282              | 10723982        | 1.23        | 163        | mitochondrial ribosomal protein L48                                                                                               |
| Rbm41                              | NM_001109420              | 10939498        | 0.83        | -30        | RNA binding motif protein 41                                                                                                      |
| Taf7                               | NM_001107394              | 10804015        | 1.20        | 510        | TAF7 RNA polymerase II, TATA box binding protein (TBP)-associated factor, 55kDa                                                   |
| <b>Miscellaneous &amp; Unknown</b> |                           |                 |             |            |                                                                                                                                   |
| Fam43a                             | NM_001039002              | 10754939        | 1.26        | 50         | family with sequence similarity 43, member A                                                                                      |
| <b>Fam50a</b>                      | <b>NM_001170573</b>       | <b>10940358</b> | <b>0.83</b> | <b>-34</b> | <b>family with sequence similarity 50, member A</b>                                                                               |
| LOC100137086                       | NM_001114656              | 10838959        | 0.66        | -41        | hypothetical protein LOC100137086                                                                                                 |
| LOC100359800                       | ENSRNOT00000060303        | 10783474        | 0.78        | -19        | rCG64478-like                                                                                                                     |
| LOC100359861                       | ENSRNOT00000047282        | 10812903        | 1.23        | 293        | mCG51409-like                                                                                                                     |
| LOC100360220                       | ENSRNOT00000060396        | 10780029        | 0.78        | -22        | rCG20053-like                                                                                                                     |
| LOC100360350                       | ENSRNOT00000060360        | 10779978        | 0.73        | -16        | mCG140239-like                                                                                                                    |
| LOC100361188                       | ENSRNOT00000021284        | 10859627        | 1.41        | 506        | ghiso                                                                                                                             |
| LOC100361390                       | ENSRNOT00000060393        | 10780038        | 0.77        | -11        | mCG1025068-like                                                                                                                   |
| LOC100361418                       | ENSRNOT00000064258        | 10786126        | 0.76        | -35        | hypothetical protein LOC100361418                                                                                                 |
| LOC100361589                       | ENSRNOT00000060344        | 10783416        | 0.73        | -25        | mCG140367-like                                                                                                                    |
| LOC100362690                       | ENSRNOT00000030635        | 10908998        | 0.54        | -39        | rCG64164-like                                                                                                                     |
| LOC100363541                       | ENSRNOT00000040239        | 10750108        | 0.54        | -65        | hypothetical protein LOC100363541                                                                                                 |
| LOC100366148                       | ENSRNOT00000067743        | 10780082        | 0.75        | -37        | hypothetical protein LOC100366148                                                                                                 |
| <b>LOC302845</b>                   | <b>NM_001013962</b>       | <b>10935622</b> | <b>1.26</b> | <b>16</b>  | <b>similar to mage-k1</b>                                                                                                         |
| LOC366768                          | ENSRNOT00000051567        | 10892656        | 0.74        | -37        | mCG127631-like                                                                                                                    |
| LOC498759                          | ENSRNOT00000040660        | 10798621        | 0.79        | -15        | LRRGT00094                                                                                                                        |
| <b>LOC499234</b>                   | <b>ENSRNOT00000051854</b> | <b>10709667</b> | <b>0.71</b> | <b>-21</b> | <b>similar to NACHT, leucine rich repeat and PYD containing 14-like</b>                                                           |
| LOC678814                          | ENSRNOT00000060281        | 10780135        | 0.66        | -32        | hypothetical protein LOC678814                                                                                                    |
| LOC680062                          | ENSRNOT00000066991        | 10779200        | 0.79        | -92        | hypothetical protein LOC680062                                                                                                    |
| LOC682195                          | ENSRNOT00000057852        | 10766044        | 1.26        | 16         | hypothetical protein LOC682195                                                                                                    |
| LOC682999                          | NM_001127600              | 10766437        | 1.24        | 428        | hypothetical protein LOC682999                                                                                                    |
| LOC685105                          | ENSRNOT00000048639        | 10806501        | 0.61        | -20        | hypothetical protein LOC685105                                                                                                    |
| LOC685261                          | XM_001063064              | 10752953        | 0.76        | -34        | hypothetical protein LOC685261                                                                                                    |
| LOC685349                          | ENSRNOT00000061603        | 10750100        | 0.73        | -37        | hypothetical protein LOC685349                                                                                                    |
| LOC685424                          | ENSRNOT00000050888        | 10809909        | 0.63        | -42        | hypothetical protein LOC685424                                                                                                    |
| LOC685544                          | NM_001109474              | 10712457        | 0.70        | -46        | hypothetical protein LOC685544                                                                                                    |
| LOC691011                          | ENSRNOT00000060368        | 10780088        | 0.76        | -22        | rCG38400-like                                                                                                                     |
| LOC691048                          | ENSRNOT00000068439        | 10783368        | 0.70        | -18        | RGD1359684 protein-like                                                                                                           |
| LOC691079                          | ENSRNOT00000060356        | 10783439        | 0.81        | -15        | rCG64215-like                                                                                                                     |
| LOC691264                          | ENSRNOT00000048915        | 10780044        | 0.69        | -22        | rCG23598-like                                                                                                                     |
| RGD1305455                         | NM_001024969              | 10760877        | 1.26        | 101        | similar to hypothetical protein FLJ10925                                                                                          |
| RGD1309106                         | NM_001014130              | 10769262        | 0.71        | -15        | similar to hypothetical protein (chr13)                                                                                           |
| RGD1310571                         | NM_001014147              | 10935033        | 1.31        | 281        | similar to hypothetical protein (chrX)                                                                                            |



|                 |                           |                 |             |            |                                                         |
|-----------------|---------------------------|-----------------|-------------|------------|---------------------------------------------------------|
| RGD1560398      | ENSRNOT00000056932        | 10759058        | 1.29        | 31         | RGD1560398                                              |
| RGD1562136      | NM_001109086              | 10925753        | 1.35        | 63         | similar to D1Ert622e protein                            |
| RGD1562319      | ENSRNOT00000060024        | 10760870        | 0.75        | -17        | similar to family with sequence similarity 55, member C |
| RGD1563569      | ENSRNOT00000064359        | 10779984        | 0.76        | -11        | similar to variable region-alpha RAV4.22                |
| RGD1564195      | ENSRNOT00000049044        | 10725914        | 0.73        | -28        | similar to hypothetical protein                         |
| RGD1565033      | NM_001109050              | 10739206        | 1.29        | 72         | similar to hypothetical protein LOC284018 isoform b     |
| RGD1565493      | XM_002729803              | 10903288        | 0.71        | -17        | similar to DKFZP434I092 protein                         |
| Rwdd4a          | NM_001034994              | 10938439        | 1.35        | 165        | RWD domain containing 4A                                |
| Samd12          | NM_001130562              | 10903721        | 0.78        | -13        | sterile alpha motif domain containing 12                |
| Sgp158          | NM_139184                 | 10859183        | 0.72        | -16        | proline-rich glycoprotein (sgp158)                      |
| Spetex-2D       | NM_001011701              | 10779288        | 0.56        | -69        | Spetex-2D protein                                       |
| <b>Tdrd12</b>   | <b>ENSRNOT00000017021</b> | <b>10721099</b> | <b>1.31</b> | <b>17</b>  | <b>tudor domain containing 12</b>                       |
| Tmco6           | NM_001106154              | 10801074        | 0.81        | -84        | transmembrane and coiled-coil domains 6                 |
| Ttc19           | NM_001109644              | 10734294        | 1.37        | 91         | tetratricopeptide repeat domain 19                      |
| <b>Wdr46</b>    | <b>NM_212491</b>          | <b>10831747</b> | <b>1.24</b> | <b>147</b> | <b>WD repeat domain 46</b>                              |
| <b>microRNA</b> |                           |                 |             |            |                                                         |
| Mir135a         | NR_031881                 | 10901840        | 0.68        | -13        | microRNA mir-135a                                       |
| Mir17-1         | NR_031818                 | 10781974        | 0.78        | -14        | microRNA mir-17-1                                       |
| Mir214          | NR_031927                 | 10765111        | 0.75        | -44        | microRNA mir-214                                        |
| Mir215          | NR_032110                 | 10766510        | 0.68        | -14        | microRNA mir-215                                        |
| Mir296          | NR_031940                 | 10852170        | 0.72        | -18        | microRNA mir-296                                        |
| Mir330          | NR_031777                 | 10704784        | 0.78        | -17        | microRNA mir-330                                        |
| Mir98           | NR_031855                 | 10933128        | 0.80        | -28        | microRNA mir-98                                         |
| Mirlet7b        | NR_031802                 | 10898357        | 0.81        | -18        | microRNA let-7b                                         |
| Mir218-1        | NR_031931                 | 10777176        | 0.58        | -138       | microRNA mir-218-1                                      |
| Mir341          | rno-mir-341               | 10886842        | 0.78        | -56        | microRNA mir-341                                        |
| Mir346          | NR_031790                 | 10787029        | 0.81        | -91        | microRNA mir-346                                        |
| <b>EST's</b>    |                           |                 |             |            |                                                         |
| LOC290071       | BC088274                  | 10780026        | 0.69        | -35        | similar to RIKEN cDNA A430107P09 gene                   |
| RGD1311273      | NM_001109475              | 10741629        | 1.30        | 37         | similar to RIKEN cDNA 9530058B02                        |
| RGD1305207      | BC079419                  | 10899416        | 0.80        | -22        | similar to RIKEN cDNA 1700011A15                        |
| RGD1561557      | NM_001108929              | 10829351        | 0.79        | -83        | similar to chromosome 21 open reading frame 29          |
| RGD1309374      | ENSRNOT00000020492        | 10703327        | 0.83        | -61        | LOC361485                                               |
| RGD1305939      | NM_001130581              | 10897648        | 0.67        | -23        | hypothetical LOC300074                                  |
| RGD1306636      | ENSRNOT00000055016        | 10725887        | 0.80        | -13        | hypothetical LOC293498                                  |
|                 | AF254801                  | 10757629        | 0.83        | -13        |                                                         |
|                 | ENSRNOT00000002781        | 10891491        | 0.66        | -15        |                                                         |
|                 | ENSRNOT00000004499        | 10833361        | 1.26        | 24         |                                                         |
|                 | ENSRNOT00000005636        | 10904230        | 0.78        | -17        |                                                         |
|                 | ENSRNOT00000006775        | 10884898        | 1.52        | 93         |                                                         |
|                 | ENSRNOT00000007380        | 10766078        | 0.72        | -32        |                                                         |
|                 | ENSRNOT00000007844        | 10890949        | 0.74        | -13        |                                                         |
|                 | ENSRNOT00000008848        | 10862850        | 1.23        | 55         |                                                         |
|                 | ENSRNOT00000009816        | 10852733        | 0.82        | -34        |                                                         |
|                 | ENSRNOT00000012507        | 10824763        | 0.79        | -40        |                                                         |
|                 | ENSRNOT00000013436        | 10704380        | 1.84        | 127        |                                                         |
|                 | ENSRNOT00000016081        | 10792132        | 1.36        | 128        |                                                         |
|                 | ENSRNOT00000017015        | 10854357        | 1.20        | 20         |                                                         |
|                 | ENSRNOT00000018039        | 10923336        | 1.44        | 81         |                                                         |
|                 | ENSRNOT00000024332        | 10850988        | 1.24        | 47         |                                                         |
|                 | ENSRNOT00000024516        | 10729852        | 1.25        | 220        |                                                         |
|                 | ENSRNOT00000024688        | 10793706        | 1.21        | 10         |                                                         |
|                 | ENSRNOT00000024998        | 10709364        | 0.79        | -19        |                                                         |
|                 | ENSRNOT00000025383        | 10920986        | 0.70        | -72        |                                                         |
|                 | ENSRNOT00000029032        | 10787958        | 1.29        | 23         |                                                         |
|                 | ENSRNOT00000030299        | 10782761        | 0.71        | -16        |                                                         |

|  |                           |                 |             |            |  |
|--|---------------------------|-----------------|-------------|------------|--|
|  | <b>ENSRNOT00000030811</b> | <b>10770140</b> | <b>1.48</b> | <b>40</b>  |  |
|  | ENSRNOT00000031816        | 10894159        | 1.24        | 111        |  |
|  | ENSRNOT00000032578        | 10918485        | 0.81        | -24        |  |
|  | <b>ENSRNOT00000032989</b> | <b>10938820</b> | <b>0.73</b> | <b>-16</b> |  |
|  | ENSRNOT00000033247        | 10756127        | 0.81        | -28        |  |
|  | ENSRNOT00000033434        | 10939180        | 0.83        | -44        |  |
|  | ENSRNOT00000034281        | 10771765        | 1.37        | 161        |  |
|  | ENSRNOT00000034419        | 10833894        | 1.37        | 27         |  |
|  | ENSRNOT00000034550        | 10779334        | 0.77        | -16        |  |
|  | ENSRNOT00000034660        | 10806869        | 0.73        | -20        |  |
|  | ENSRNOT00000034855        | 10795361        | 0.67        | -17        |  |
|  | ENSRNOT00000035375        | 10820096        | 1.35        | 21         |  |
|  | ENSRNOT00000035387        | 10934046        | 0.77        | -26        |  |
|  | ENSRNOT00000036265        | 10845363        | 1.27        | 26         |  |
|  | ENSRNOT00000036335        | 10835888        | 0.72        | -12        |  |
|  | <b>ENSRNOT00000036735</b> | <b>10854239</b> | <b>1.35</b> | <b>37</b>  |  |
|  | ENSRNOT00000036884        | 10795677        | 1.40        | 28         |  |
|  | ENSRNOT00000038163        | 10901036        | 1.39        | 283        |  |
|  | ENSRNOT00000038381        | 10742118        | 1.33        | 20         |  |
|  | ENSRNOT00000038522        | 10902012        | 0.76        | -20        |  |
|  | ENSRNOT00000039834        | 10732924        | 1.48        | 31         |  |
|  | ENSRNOT00000039879        | 10897891        | 1.29        | 78         |  |
|  | ENSRNOT00000039948        | 10767044        | 1.45        | 883        |  |
|  | ENSRNOT00000039983        | 10747141        | 0.78        | -67        |  |
|  | ENSRNOT00000040043        | 10915273        | 0.59        | -20        |  |
|  | ENSRNOT00000040554        | 10718155        | 0.72        | -30        |  |
|  | ENSRNOT00000040940        | 10904601        | 1.39        | 44         |  |
|  | ENSRNOT00000042573        | 10879913        | 0.72        | -16        |  |
|  | ENSRNOT00000042949        | 10839417        | 1.30        | 15         |  |
|  | ENSRNOT00000043132        | 10720555        | 0.49        | -304       |  |
|  | ENSRNOT00000043225        | 10933166        | 1.25        | 24         |  |
|  | ENSRNOT00000044403        | 10775741        | 0.76        | -12        |  |
|  | ENSRNOT00000044643        | 10717398        | 0.74        | -20        |  |
|  | ENSRNOT00000044695        | 10862982        | 0.81        | -12        |  |
|  | ENSRNOT00000046555        | 10892346        | 0.79        | -89        |  |
|  | ENSRNOT00000046658        | 10924505        | 0.66        | -97        |  |
|  | ENSRNOT00000047283        | 10827409        | 0.80        | -16        |  |
|  | <b>ENSRNOT00000047567</b> | <b>10842660</b> | <b>1.21</b> | <b>16</b>  |  |
|  | ENSRNOT00000047758        | 10775226        | 0.69        | -70        |  |
|  | ENSRNOT00000047949        | 10704169        | 0.70        | -11        |  |
|  | ENSRNOT00000048037        | 10892490        | 0.68        | -22        |  |
|  | ENSRNOT00000048310        | 10802601        | 0.82        | -13        |  |
|  | ENSRNOT00000048840        | 10747160        | 0.80        | -63        |  |
|  | ENSRNOT00000048906        | 10800328        | 0.80        | -12        |  |
|  | ENSRNOT00000049343        | 10938547        | 0.61        | -30        |  |
|  | ENSRNOT00000050510        | 10724593        | 0.58        | -48        |  |
|  | ENSRNOT00000051223        | 10791274        | 0.60        | -139       |  |
|  | ENSRNOT00000051410        | 10892671        | 0.51        | -32        |  |
|  | ENSRNOT00000051657        | 10780085        | 0.75        | -23        |  |
|  | ENSRNOT00000051864        | 10719071        | 0.73        | -18        |  |
|  | ENSRNOT00000052478        | 10871052        | 0.62        | -33        |  |
|  | ENSRNOT00000052538        | 10819400        | 0.82        | -12        |  |
|  | ENSRNOT00000052877        | 10820010        | 0.75        | -14        |  |
|  | ENSRNOT00000052950        | 10819944        | 0.69        | -51        |  |
|  | ENSRNOT00000052962        | 10845441        | 0.77        | -17        |  |
|  | ENSRNOT00000052993        | 10722475        | 0.65        | -21        |  |
|  | ENSRNOT00000053060        | 10822390        | 0.57        | -26        |  |
|  | ENSRNOT00000053081        | 10722479        | 0.58        | -40        |  |
|  | ENSRNOT00000053175        | 10804243        | 0.80        | -75        |  |
|  | ENSRNOT00000053205        | 10701988        | 0.77        | -14        |  |
|  | ENSRNOT00000053262        | 10925572        | 0.80        | -37        |  |
|  | ENSRNOT00000053285        | 10816263        | 0.76        | -12        |  |
|  | <b>ENSRNOT00000053306</b> | <b>10854959</b> | <b>0.72</b> | <b>-24</b> |  |

|  |                           |                 |             |            |  |
|--|---------------------------|-----------------|-------------|------------|--|
|  | ENSRNOT00000053496        | 10903998        | 0.75        | -38        |  |
|  | ENSRNOT00000053524        | 10850666        | 0.78        | -41        |  |
|  | ENSRNOT00000053867        | 10805075        | 0.63        | -44        |  |
|  | ENSRNOT00000053929        | 10839872        | 0.80        | -948       |  |
|  | ENSRNOT00000053958        | 10722401        | 0.65        | -18        |  |
|  | ENSRNOT00000054191        | 10807031        | 0.52        | -24        |  |
|  | ENSRNOT00000054348        | 10787050        | 0.71        | -22        |  |
|  | ENSRNOT00000054515        | 10794274        | 0.83        | -11        |  |
|  | ENSRNOT00000054567        | 10856162        | 0.74        | -40        |  |
|  | ENSRNOT00000055140        | 10738944        | 0.72        | -23        |  |
|  | ENSRNOT00000056771        | 10892648        | 0.79        | -12        |  |
|  | ENSRNOT00000056835        | 10892478        | 0.79        | -11        |  |
|  | ENSRNOT00000056841        | 10879107        | 0.80        | -66        |  |
|  | ENSRNOT00000056846        | 10939615        | 0.69        | -97        |  |
|  | ENSRNOT00000056866        | 10857468        | 0.76        | -13        |  |
|  | ENSRNOT00000057274        | 10911568        | 0.82        | -15        |  |
|  | ENSRNOT00000057494        | 10863683        | 0.73        | -19        |  |
|  | ENSRNOT00000057576        | 10773797        | 0.77        | -26        |  |
|  | ENSRNOT00000057905        | 10846668        | 0.71        | -64        |  |
|  | ENSRNOT00000058202        | 10895665        | 0.73        | -21        |  |
|  | ENSRNOT00000058407        | 10895524        | 0.75        | -13        |  |
|  | ENSRNOT00000058693        | 10781288        | 1.33        | 90         |  |
|  | ENSRNOT00000058857        | 10890599        | 0.80        | -11        |  |
|  | ENSRNOT00000059064        | 10781110        | 0.78        | -16        |  |
|  | ENSRNOT00000059332        | 10764974        | 0.77        | -31        |  |
|  | ENSRNOT00000059528        | 10718428        | 0.72        | -16        |  |
|  | ENSRNOT00000059665        | 10836062        | 0.79        | -14        |  |
|  | ENSRNOT00000059747        | 10732800        | 0.43        | -151       |  |
|  | ENSRNOT00000059976        | 10801592        | 0.75        | -46        |  |
|  | ENSRNOT00000060162        | 10776211        | 0.72        | -209       |  |
|  | ENSRNOT00000060259        | 10876463        | 0.78        | -59        |  |
|  | ENSRNOT00000060285        | 10783521        | 0.76        | -55        |  |
|  | ENSRNOT00000060299        | 10783495        | 0.77        | -21        |  |
|  | ENSRNOT00000060660        | 10794310        | 0.79        | -10        |  |
|  | ENSRNOT00000060749        | 10908655        | 0.70        | -108       |  |
|  | ENSRNOT00000060815        | 10717588        | 0.54        | -261       |  |
|  | ENSRNOT00000061137        | 10717389        | 0.81        | -18        |  |
|  | ENSRNOT00000062081        | 10834071        | 0.73        | -84        |  |
|  | ENSRNOT00000062990        | 10722513        | 0.65        | -44        |  |
|  | ENSRNOT00000063480        | 10860865        | 0.76        | -23        |  |
|  | ENSRNOT00000063489        | 10884472        | 0.67        | -20        |  |
|  | ENSRNOT00000063607        | 10867526        | 0.77        | -13        |  |
|  | ENSRNOT00000063767        | 10715308        | 0.61        | -16        |  |
|  | ENSRNOT00000066333        | 10913991        | 1.28        | 29         |  |
|  | <b>ENSRNOT00000068960</b> | <b>10814096</b> | <b>0.58</b> | <b>-22</b> |  |
|  | ENSRNOT00000069084        | 10723553        | 0.66        | -13        |  |
|  | ENSRNOT00000069176        | 10811704        | 0.78        | -13        |  |
|  | ENSRNOT00000069806        | 10776287        | 0.78        | -17        |  |
|  | ENSRNOT00000070467        | 10792022        | 0.77        | -11        |  |
|  | FQ220821                  | 10831802        | 1.34        | 50         |  |
|  | FQ223635                  | 10797821        | 1.25        | 181        |  |
|  | <b>FQ224515</b>           | <b>10823593</b> | <b>1.40</b> | <b>84</b>  |  |
|  | FQ228224                  | 10856191        | 0.78        | -12        |  |
|  | FQ232545                  | 10794320        | 1.27        | 164        |  |
|  | GENSCAN00000006519        | 10751341        | 1.24        | 33         |  |
|  | GENSCAN00000009330        | 10916917        | 0.77        | -33        |  |
|  | GENSCAN00000011788        | 10940007        | 1.25        | 48         |  |
|  | GENSCAN00000015898        | 10763457        | 0.72        | -15        |  |
|  | GENSCAN00000028416        | 10752259        | 0.57        | -25        |  |
|  | GENSCAN00000034118        | 10938647        | 1.29        | 34         |  |
|  | <b>NC_001665</b>          | <b>10930620</b> | <b>1.44</b> | <b>524</b> |  |
|  | ---                       | 10725041        | 0.71        | -59        |  |
|  | ---                       | 10707118        | 0.77        | -19        |  |

|     |          |      |      |  |
|-----|----------|------|------|--|
| --- | 10710338 | 0.65 | -13  |  |
| --- | 10724387 | 0.63 | -13  |  |
| --- | 10732056 | 0.73 | -20  |  |
| --- | 10737045 | 0.77 | -17  |  |
| --- | 10750511 | 0.61 | -31  |  |
| --- | 10750023 | 0.64 | -22  |  |
| --- | 10758894 | 0.82 | -13  |  |
| --- | 10764142 | 0.80 | -10  |  |
| --- | 10772909 | 0.75 | -13  |  |
| --- | 10792099 | 0.61 | -20  |  |
| --- | 10790615 | 0.76 | -15  |  |
| --- | 10803841 | 0.71 | -374 |  |
| --- | 10809090 | 0.44 | -27  |  |
| --- | 10825573 | 0.73 | -55  |  |
| --- | 10826983 | 0.66 | -17  |  |
| --- | 10844687 | 0.63 | -75  |  |
| --- | 10843137 | 1.59 | 155  |  |
| --- | 10845605 | 1.22 | 247  |  |
| --- | 10864556 | 0.81 | -16  |  |
| --- | 10857067 | 0.80 | -11  |  |
| --- | 10872129 | 0.68 | -74  |  |
| --- | 10874979 | 0.76 | -43  |  |
| --- | 10868550 | 0.69 | -21  |  |
| --- | 10916853 | 0.80 | -55  |  |
| --- | 10908746 | 0.67 | -34  |  |

25 Genes overlapped with E16 PGC list are marked by bold font.
