# Supplementary material for: Environmentally Induced Transgenerational Epigenetic Reprogramming of Primordial Germ Cells and the Subsequent Germ Line
Source: PubMed Central journal article supplement (PMC3712023; doi:10.1371/journal.pone.0066318), 2013-07-15
Supplement: pone.0066318.s003.pdf [file pone.0066318.s003.pdf]

Supplemental Table S2

Genes Differentially Expressed in E16 F3 Generation Germ Cells

| GENE FUNCTIONAL GROUP/ Gene Symbol   | RefSeq/GenBank/ Ensemble Number | Affymetrix Probeset ID | Vin/Con     | Mean Diff. | Gene Title                                                          |
|--------------------------------------|---------------------------------|------------------------|-------------|------------|---------------------------------------------------------------------|
| <b>Apoptosis</b>                     |                                 |                        |             |            |                                                                     |
| Apaf1                                | NM_023979                       | 10901783               | 0.83        | -86        | apoptotic peptidase activating factor 1                             |
| <b>Cell Cycle</b>                    |                                 |                        |             |            |                                                                     |
| Cep135                               | ENSRNOT00000032156              | 10776370               | 0.81        | -23        | centrosomal protein 135kDa                                          |
| Ddit3                                | NM_001109986                    | 10895861               | 0.74        | -48        | DNA-damage inducible transcript 3                                   |
| Rprd1b                               | NM_001098727                    | 10841669               | 0.79        | -42        | regulation of nuclear pre-mRNA domain containing 1B                 |
| <b>Cytoskeleton-ECM</b>              |                                 |                        |             |            |                                                                     |
| LOC687234                            | ENSRNOT00000002004              | 10761245               | 0.79        | -50        | similar to actin related protein 2/3 complex, subunit 5             |
| Cadm1                                | NM_001012201                    | 10909761               | 0.80        | -62        | cell adhesion molecule 1                                            |
| Cgn                                  | ENSRNOT00000028440              | 10824860               | 0.73        | -60        | cingulin                                                            |
| Dnah11                               | ENSRNOT00000007233              | 10892706               | 0.83        | -19        | dynein, axonemal, heavy chain 11                                    |
| Mcoln1                               | NM_001105903                    | 10759698               | 1.21        | 295        | mucolipin 1                                                         |
| <b>Pcdh15</b>                        | <b>ENSRNOT00000066040</b>       | <b>10832646</b>        | <b>1.22</b> | <b>12</b>  | <b>protocadherin 15</b>                                             |
| <b>Development</b>                   |                                 |                        |             |            |                                                                     |
| Cpne3                                | NM_001107917                    | 10875680               | 0.76        | -283       | copine III                                                          |
| Gtsf1                                | NM_001079707                    | 10907722               | 1.41        | 154        | gametocyte specific factor 1                                        |
| Lin37                                | NM_001106245                    | 10720648               | 1.25        | 154        | lin-37 homolog (C. elegans)                                         |
| <b>LOC171573</b>                     | <b>NM_138537</b>                | <b>10909012</b>        | <b>1.24</b> | <b>47</b>  | <b>spleen protein 1 precursor</b>                                   |
| LOC685411                            | ENSRNOT000000041115             | 10806538               | 1.40        | 12         | similar to spermatogenesis associated glutamate (E)-rich protein 4b |
| Meig1                                | NM_001134882                    | 10796413               | 0.70        | -24        | meiosis expressed gene 1                                            |
| <b>Mospd1</b>                        | <b>NM_001014107</b>             | <b>10939816</b>        | <b>0.82</b> | <b>-41</b> | <b>motile sperm domain containing 1</b>                             |
| Mospd2                               | NM_001134588                    | 10933408               | 0.75        | -143       | motile sperm domain containing 2                                    |
| Shank1                               | NM_031751                       | 10706515               | 1.24        | 17         | SH3 and multiple ankyrin repeat domains 1                           |
| Tmem231                              | ENSRNOT000000031243             | 10811208               | 0.81        | -81        | transmembrane protein 231                                           |
| Trank1                               | NM_001191799                    | 10913866               | 0.77        | -529       | tetratricopeptide repeat and ankyrin repeat containing 1            |
| <b>Electron Transport</b>            |                                 |                        |             |            |                                                                     |
| Cyp20a1                              | NM_199401                       | 10923768               | 0.83        | -58        | cytochrome P450, family 20, subfamily a, polypeptide 1              |
| <b>Epigenetics</b>                   |                                 |                        |             |            |                                                                     |
| Hdac8                                | NM_001126373                    | 10938734               | 1.23        | 22         | histone deacetylase 8                                               |
| Hfm1                                 | NM_001191101                    | 10771099               | 1.28        | 27         | HFM1, ATP-dependent DNA helicase homolog (S. cerevisiae)            |
| <b>Golgi Apparatus</b>               |                                 |                        |             |            |                                                                     |
| LOC685079                            | ENSRNOT000000030054             | 10842117               | 1.37        | 180        | similar to Protein SYS1 homolog                                     |
| <b>Growth Factors &amp; Hormones</b> |                                 |                        |             |            |                                                                     |
| Cxcr7                                | NM_053352                       | 10925291               | 0.69        | -226       | chemokine (C-X-C motif) receptor 7                                  |
| Adipoq                               | NM_144744                       | 10755112               | 1.28        | 21         | adiponectin, C1Q and collagen domain containing                     |
| <b>Immune Response</b>               |                                 |                        |             |            |                                                                     |
| Cd3d                                 | NM_013169                       | 10909583               | 1.22        | 11         | CD3 molecule delta polypeptide                                      |
| RGD1305090                           | NM_001162535                    | 10879734               | 1.35        | 34         | similar to CD2-associated protein                                   |
| Sart1                                | NM_031596                       | 10713040               | 1.22        | 19         | squamous cell carcinoma antigen recognized by T cells               |
| Toag1                                | NM_001110838                    | 10914442               | 0.82        | -36        | tolerance-associated gene 1                                         |
| <b>Metabolism &amp; Transport</b>    |                                 |                        |             |            |                                                                     |
| Gls2                                 | NM_138904                       | 10893008               | 1.20        | 31         | glutaminase 2 (liver, mitochondrial)                                |
| <b>Hmox1</b>                         | <b>NM_012580</b>                | <b>10806122</b>        | <b>0.73</b> | <b>-69</b> | <b>heme oxygenase (decycling) 1</b>                                 |
| Kctd18                               | NM_001106914                    | 10928220               | 1.22        | 83         | potassium channel tetramerisation                                   |

|                                         |                     |                 |             |            |                                                                                       |
|-----------------------------------------|---------------------|-----------------|-------------|------------|---------------------------------------------------------------------------------------|
|                                         |                     |                 |             |            | domain containing 18                                                                  |
| Kctd21                                  | NM_001109151        | 10723718        | 1.26        | 15         | potassium channel tetramerisation domain containing 21                                |
| Pgd                                     | ENSRNOT00000018401  | 10881669        | 0.80        | -52        | phosphogluconate dehydrogenase                                                        |
| Pla2g2c                                 | NM_019202           | 10873327        | 1.33        | 18         | phospholipase A2, group IIC                                                           |
| Sdr39u1                                 | NM_001108378        | 10783981        | 1.25        | 112        | short chain dehydrogenase/reductase family 39U, member 1                              |
| Slc16a14                                | NM_001108229        | 10929536        | 0.77        | -21        | solute carrier family 16, member 14 (monocarboxylic acid transporter 14)              |
| <b>Slc25a25</b>                         | <b>NM_145677</b>    | <b>10844339</b> | <b>0.83</b> | <b>-20</b> | <b>solute carrier family 25 (mitochondrial carrier, phosphate carrier), member 25</b> |
| Slc35f2                                 | NM_001106822        | 10910038        | 1.31        | 17         | solute carrier family 35, member F2                                                   |
| Slc41a2                                 | NM_001108742        | 10894606        | 1.31        | 112        | solute carrier family 41, member 2                                                    |
| Sult2b1                                 | NM_001039665        | 10721892        | 1.24        | 70         | sulfotransferase family, cytosolic, 2B, member 1                                      |
| Timm8a2                                 | NM_001109429        | 10782124        | 1.26        | 159        | translocase of inner mitochondrial membrane 8 homolog a2 (yeast)                      |
| Tmed5                                   | NM_001007619        | 10771004        | 0.80        | -57        | transmembrane emp24 protein transport domain containing 5                             |
| <b>Proteolysis</b>                      |                     |                 |             |            |                                                                                       |
| Cst13                                   | NM_001109343        | 10840597        | 0.75        | -30        | cystatin 13                                                                           |
| Gzma                                    | NM_153468           | 10821370        | 1.78        | 124        | granzyme A                                                                            |
| Ky                                      | NM_001108180        | 10912567        | 1.29        | 18         | kyphoscoliosis peptidase                                                              |
| Rnf151                                  | NM_001106987        | 10741235        | 0.81        | -28        | ring finger protein 151                                                               |
| <b>Receptors &amp; Binding Proteins</b> |                     |                 |             |            |                                                                                       |
| Fabp9                                   | NM_022854           | 10814294        | 1.29        | 20         | fatty acid binding protein 9, testis                                                  |
| Hhip1                                   | ENSRNOT00000034883  | 10886728        | 1.27        | 28         | HHIP-like 1                                                                           |
| Olr1435                                 | NM_001000777        | 10742952        | 1.26        | 10.2       | olfactory receptor 1435                                                               |
| Olr1619                                 | NM_001000521        | 10779782        | 0.75        | -16        | olfactory receptor 1619                                                               |
| <b>Olr862</b>                           | <b>NM_001001071</b> | <b>10879329</b> | <b>1.33</b> | <b>11</b>  | <b>olfactory receptor 862</b>                                                         |
| <b>Vom2r3</b>                           | <b>NM_001099460</b> | <b>10701643</b> | <b>0.77</b> | <b>-14</b> | <b>vomerolateral 2 receptor, 3</b>                                                    |
| <b>Signaling</b>                        |                     |                 |             |            |                                                                                       |
| Ctnna1                                  | NM_001106649        | 10876896        | 0.78        | -121       | catenin (cadherin associated protein), alpha-like 1                                   |
| Dhh                                     | NM_053367           | 10907056        | 0.71        | -104       | desert hedgehog homolog (Drosophila)                                                  |
| Gch1                                    | NM_024356           | 10782919        | 0.80        | -13        | GTP cyclohydrolase 1                                                                  |
| Hipk1                                   | NM_001100986        | 10825580        | 0.73        | -116       | homeodomain interacting protein kinase 1                                              |
| LOC679596                               | ENSRNOT00000047078  | 10812017        | 1.21        | 15         | similar to GABA(A) receptor-associated protein like 2                                 |
| Mlst8                                   | NM_022404           | 10732079        | 0.82        | -24        | MTOR associated protein, LST8 homolog (S. cerevisiae)                                 |
| Nkap                                    | NM_001024872        | 10936289        | 0.71        | -70        | NFKB activating protein                                                               |
| <b>Phospho2</b>                         | <b>NM_001007642</b> | <b>10836633</b> | <b>1.32</b> | <b>108</b> | <b>phosphatase, orphan 2</b>                                                          |
| Plk2                                    | NM_031821           | 10812954        | 0.73        | -156       | polo-like kinase 2 (Drosophila)                                                       |
| Prrg4                                   | NM_001109203        | 10847957        | 0.74        | -122       | proline rich Gla (G-carboxyglutamic acid) 4 (transmembrane)                           |
| Rab3a                                   | NM_013018           | 10790912        | 1.23        | 177        | RAB3A, member RAS oncogene family                                                     |
| Rab3il1                                 | NM_134411           | 10713833        | 0.80        | -31        | RAB3A interacting protein (rabin3)-like 1                                             |
| <b>RGD1562638</b>                       | <b>NM_001100944</b> | <b>10788692</b> | <b>1.44</b> | <b>14</b>  | <b>similar to MAP/microtubule affinity-regulating kinase 3</b>                        |
| Upk3b                                   | ENSRNOT00000037639  | 10761101        | 1.35        | 14         | uroplakin 3B                                                                          |
| <b>Transcription</b>                    |                     |                 |             |            |                                                                                       |
| Bhlhe41                                 | AF009329            | 10867026        | 1.40        | 41         | basic helix-loop-helix family, member e41                                             |
| Ccdc106                                 | ENSRNOT00000021613  | 10718817        | 1.26        | 45         | coiled-coil domain containing 106                                                     |
| Ccdc130                                 | NM_001037644        | 10806687        | 1.25        | 148        | coiled-coil domain containing 130                                                     |
| Ccdc163                                 | NM_001025656        | 10871293        | 0.78        | -24        | coiled-coil domain containing 163                                                     |
| <b>Ddx25</b>                            | <b>NM_031630</b>    | <b>10916060</b> | <b>1.30</b> | <b>137</b> | <b>DEAD (Asp-Glu-Ala-Asp) box polypeptide 25</b>                                      |
| Dhx32                                   | NM_001130039        | 10726358        | 1.23        | 92         | DEAH (Asp-Glu-Ala-His) box polypeptide 32                                             |

|                                               |                           |                 |             |             |                                                                                              |
|-----------------------------------------------|---------------------------|-----------------|-------------|-------------|----------------------------------------------------------------------------------------------|
| <b>Eid3</b>                                   | <b>NM_001044304</b>       | <b>10901436</b> | <b>0.83</b> | <b>-45</b>  | <b>EP300 interacting inhibitor of differentiation 3</b>                                      |
| Fbxl20                                        | NM_022272                 | 10746856        | 1.21        | 207         | F-box and leucine-rich repeat protein 20                                                     |
| Fbxo30                                        | NM_001007690              | 10701788        | 0.82        | -142        | F-box protein 30                                                                             |
| <b>Klh136</b>                                 | <b>NM_001017511</b>       | <b>10808356</b> | <b>0.75</b> | <b>-108</b> | <b>kelch-like 36 (Drosophila)</b>                                                            |
| NdrG4                                         | NM_031967                 | 10809100        | 1.44        | 51          | N-myc downstream regulated gene 4                                                            |
| Nobox                                         | NM_001192013              | 10862317        | 1.35        | 207         | NOBOX oogenesis homeobox                                                                     |
| Phf7                                          | NM_001012211              | 10790119        | 1.21        | 38          | PHD finger protein 7                                                                         |
| Polr2d                                        | NM_001108886              | 10800667        | 1.20        | 202         | polymerase (RNA) II (DNA directed) polypeptide D                                             |
| Zc3h13                                        | NM_001170471              | 10780964        | 0.82        | -107        | zinc finger CCCH type containing 13                                                          |
| Zranb2                                        | NM_031616                 | 10819890        | 0.83        | -297        | zinc finger, RAN-binding domain containing 2                                                 |
| <b>Translation &amp; Protein Modification</b> |                           |                 |             |             |                                                                                              |
| Arl5b                                         | NM_001015031              | 10796543        | 0.79        | -191        | ADP-ribosylation factor-like 5B                                                              |
| Cabc1                                         | NM_001013185              | 10770313        | 1.21        | 115         | chaperone, ABC1 activity of bc1 complex homolog (S. pombe)                                   |
| Trmt12                                        | NM_001122976              | 10896745        | 1.22        | 11          | tRNA methyltransferase 12 homolog (S. cerevisiae)                                            |
| <b>Miscellaneous &amp; Unknown</b>            |                           |                 |             |             |                                                                                              |
| Fam178b                                       | NM_001122658              | 10927402        | 1.42        | 381         | family with sequence similarity 178, member B                                                |
| Fam38a                                        | NM_001077200              | 10811596        | 0.83        | -35         | family with sequence similarity 38, member A                                                 |
| <b>Fam50a</b>                                 | <b>NM_001170573</b>       | <b>10856453</b> | <b>0.81</b> | <b>-37</b>  | <b>family with sequence similarity 50, member A</b>                                          |
| LOC100365542                                  | XM_002725468              | 10717350        | 1.33        | 19          | rCG41957-like                                                                                |
| LOC100366112                                  | ENSRNOT00000036989        | 10934470        | 1.39        | 34          | rCG64283-like                                                                                |
| <b>LOC302845</b>                              | <b>NM_001013962</b>       | <b>10935622</b> | <b>0.83</b> | <b>-40</b>  | <b>similar to mage-k1</b>                                                                    |
| <b>LOC499234</b>                              | <b>ENSRNOT00000051854</b> | <b>10709667</b> | <b>1.37</b> | <b>112</b>  | <b>similar to NACHT, leucine rich repeat and PYD containing 14-like</b>                      |
| LOC500625                                     | ENSRNOT00000006877        | 10883445        | 0.82        | -87         | hypothetical protein LOC500625                                                               |
| LOC502822                                     | ENSRNOT00000040099        | 10863026        | 1.30        | 14          | mCG130744-like                                                                               |
| RGD1308350                                    | ENSRNOT00000018225        | 10887486        | 1.32        | 43          | similar to hypothetical protein MGC13251                                                     |
| RGD1565119                                    | ENSRNOT00000048106        | 10776873        | 0.79        | -28         | similar to Mitochondrial carrier triple repeat 1                                             |
| Rsb66                                         | NM_181694                 | 10844055        | 0.82        | -13         | Rsb-66 protein                                                                               |
| Samd5                                         | NM_001108901              | 10716704        | 0.77        | -10         | sterile alpha motif domain containing 5                                                      |
| <b>Tdrd12</b>                                 | <b>ENSRNOT00000017021</b> | <b>10721099</b> | <b>1.49</b> | <b>110</b>  | <b>tudor domain containing 12</b>                                                            |
| Tmem116                                       | NM_001159625              | 10762108        | 1.42        | 49          | transmembrane protein 116                                                                    |
| Tmem135                                       | NM_001013896              | 10723560        | 0.79        | -109        | transmembrane protein 135                                                                    |
| <b>Wdr46</b>                                  | <b>NM_212491</b>          | <b>10831747</b> | <b>1.26</b> | <b>293</b>  | <b>WD repeat domain 46</b>                                                                   |
| Wdr53                                         | NM_001109055              | 10754862        | 1.23        | 35          | WD repeat domain 53                                                                          |
| <b>microRNA</b>                               |                           |                 |             |             |                                                                                              |
| Mir19a                                        | NR_031822                 | 10781978        | 0.62        | -136        | microRNA mir-19a                                                                             |
| Mir20a                                        | NR_031793                 | 10781980        | 0.74        | -51         | microRNA mir-20a                                                                             |
| <b>EST's</b>                                  |                           |                 |             |             |                                                                                              |
| LOC691286                                     | NM_001109634              | 10742913        | 1.22        | 13          | similar to RIKEN cDNA 4930504O13                                                             |
| RGD1309482                                    | NM_001014246              | 10729979        | 0.72        | -69         | similar to chromosome 10 open reading frame 4; similar to putative acid phosphatase F26C11.1 |
| RGD1311078                                    | BC168942                  | 10739781        | 1.22        | 268         | LOC360664                                                                                    |
| ---                                           |                           | 10742386        | 0.82        | -257        |                                                                                              |
| ---                                           |                           | 10934982        | 0.71        | -18         |                                                                                              |
| ---                                           |                           | 10903594        | 1.20        | 10.4        |                                                                                              |
|                                               | ENSRNOT00000006064        | 10902791        | 0.79        | -19         |                                                                                              |
|                                               | ENSRNOT00000008360        | 10893453        | 1.26        | 38          |                                                                                              |
|                                               | ENSRNOT00000029207        | 10821047        | 1.25        | 45          |                                                                                              |
|                                               | <b>ENSRNOT00000030811</b> | <b>10770140</b> | <b>0.78</b> | <b>-27</b>  |                                                                                              |
|                                               | ENSRNOT00000031638        | 10772802        | 0.79        | -16         |                                                                                              |
|                                               | <b>ENSRNOT00000032989</b> | <b>10938820</b> | <b>1.28</b> | <b>20</b>   |                                                                                              |
|                                               | <b>ENSRNOT00000036735</b> | <b>10854239</b> | <b>0.75</b> | <b>-81</b>  |                                                                                              |

|  |                           |                 |             |             |        |
|--|---------------------------|-----------------|-------------|-------------|--------|
|  | ENSRNOT00000037885        | 10885903        | 1.25        | 29          |        |
|  | ENSRNOT00000041436        | 10869874        | 1.27        | 13          |        |
|  | ENSRNOT00000041963        | 10938531        | 1.23        | 28          |        |
|  | ENSRNOT00000047129        | 10716982        | 1.23        | 19          | (chr1) |
|  | ENSRNOT00000047129        | 10902883        | 1.23        | 19          | (chr7) |
|  | ENSRNOT00000047129        | 10918829        | 1.23        | 19          | (chr8) |
|  | ENSRNOT00000047129        | 10836210        | 1.25        | 21          | (chr3) |
|  | <b>ENSRNOT00000047567</b> | <b>10842660</b> | <b>0.83</b> | <b>-32</b>  |        |
|  | ENSRNOT00000051759        | 10915740        | 0.79        | -48         |        |
|  | ENSRNOT00000052060        | 10783533        | 1.26        | 49          |        |
|  | ENSRNOT00000052472        | 10728561        | 0.46        | -1953       |        |
|  | <b>ENSRNOT00000053306</b> | <b>10854959</b> | <b>1.23</b> | <b>15</b>   |        |
|  | ENSRNOT00000053925        | 10755670        | 1.35        | 94          |        |
|  | ENSRNOT00000054149        | 10734340        | 0.72        | -337        |        |
|  | ENSRNOT00000054274        | 10885448        | 0.72        | -27         |        |
|  | ENSRNOT00000057118        | 10833811        | 0.80        | -550        |        |
|  | ENSRNOT00000057159        | 10766878        | 1.24        | 11          |        |
|  | ENSRNOT00000059351        | 10822320        | 1.28        | 11          |        |
|  | ENSRNOT00000059648        | 10854733        | 1.31        | 14          |        |
|  | <b>ENSRNOT00000068960</b> | <b>10904356</b> | <b>1.30</b> | <b>29</b>   |        |
|  | FQ212434                  | 10905587        | 0.82        | -69         |        |
|  | <b>FQ224515</b>           | <b>10823593</b> | <b>0.82</b> | <b>-51</b>  |        |
|  | <b>NC_001665</b>          | <b>10930612</b> | <b>1.36</b> | <b>1119</b> |        |

25 Genes overlapped with E13 PGC list are marked by bold font.
